# Supplementary material for: High salt intake damages myocardial viability and induces cardiac remodeling via chronic inflammation in the elderly
Source: PubMed Central journal article supplement (PMC9582749; doi:10.3389/fcvm.2022.952691), 2022-10-06
Supplement: Data_Sheet_1.pdf [file Data_Sheet_1.pdf]

## Supplementary Materials

**Supplementary Table S1. Demographic and clinical characteristics of the study participants in the two cohorts**

| Cohort                            | April 2007 to November 2010               | August 2019 to November 2019          | <i>P-value</i> |
|-----------------------------------|-------------------------------------------|---------------------------------------|----------------|
|                                   | ChiCTR-EOC-17013598<br>( <i>n</i> = 3287) | ChiCTR1900023580<br>( <i>n</i> = 523) |                |
| Age, years                        | 68.09 ± 6.08                              | 68.04 ± 5.41                          | 0.859          |
| Sex, female (%)                   | 1578 (48.0)                               | 240 (45.9)                            | 0.368          |
| Smoking, <i>n</i> (%)             | 984 (29.9)                                | 152 (29.1)                            | 0.685          |
| Drinking, <i>n</i> (%)            | 942 (28.7)                                | 167 (31.9)                            | 0.126          |
| Exercise, <i>n</i> (%)            | 2155 (65.6)                               | 362 (69.2)                            | 0.101          |
| Myocardial ischemia, <i>n</i> (%) | 1054 (32.1)                               | 173 (33.1)                            | 0.645          |
| Hypertension, <i>n</i> (%)        | 2334 (71.0)                               | 375 (71.7)                            | 0.745          |
| Anti-hypertensive medications     |                                           |                                       |                |

|                                                       |                |                |        |
|-------------------------------------------------------|----------------|----------------|--------|
| Diuretics, <i>n</i> (%)                               | 991 (30.1)     | 130 (24.9)     | 0.014  |
| Beta-blocker, <i>n</i> (%)                            | 574 (17.5)     | 104 (19.9)     | 0.178  |
| Calcium channel blocker, <i>n</i> (%)                 | 795 (24.2)     | 135 (25.8)     | 0.421  |
| Angiotensin-converting enzyme inhibitor, <i>n</i> (%) | 848 (25.8)     | 148 (28.3)     | 0.227  |
| Angiotensin receptor blocker, <i>n</i> (%)            | 622 (18.9)     | 122 (23.3)     | 0.018  |
| Diabetes, <i>n</i> (%)                                | 422 (12.8)     | 67 (12.8)      | 0.986  |
| Glucose-lowering medication, <i>n</i> (%)             | 411 (12.5)     | 67 (12.8)      | 0.844  |
| Dyslipidemia, <i>n</i> (%)                            | 1751 (53.3)    | 301 (57.6)     | 0.068  |
| Anti-dyslipidemia medication, <i>n</i> (%)            | 489 (14.9)     | 149 (28.5)     | <0.001 |
| Antiplatelet medication, <i>n</i> (%)                 | 1040 (31.6)    | 168 (32.1)     | 0.826  |
| BMI, kg/m <sup>2</sup>                                | 25.45 ± 3.54   | 25.70 ± 3.37   | 0.131  |
| SBP, mmHg                                             | 147.28 ± 19.44 | 147.34 ± 15.72 | 0.946  |
| DBP, mmHg                                             | 71.51 ± 9.36   | 71.11 ± 8.17   | 0.356  |

|                       |              |              |       |
|-----------------------|--------------|--------------|-------|
| Heart rate, beats/min | 72.31 ± 9.21 | 72.02 ± 8.15 | 0.497 |
| FPG, mmol/L           | 5.82 ± 1.69  | 5.79 ± 1.27  | 0.697 |
| TCHO, mmol/L          | 4.77 ± 0.91  | 4.74 ± 0.68  | 0.470 |
| TG, mmol/L            | 1.62 ± 0.70  | 1.63 ± 0.49  | 0.054 |
| HDL-C, mmol/L         | 1.15 ± 0.41  | 1.17 ± 0.33  | 0.288 |
| LDL-C, mmol/L         | 2.88 ± 0.81  | 2.86 ± 0.61  | 0.595 |
| hsCRP, mg/dL          | 0.61 ± 0.23  | 0.62 ± 0.24  | 0.359 |

---

The results are presented as the mean ± SD or the median (IQR, the range from the 25th to 75th percentile), or as frequencies and percentages.

BMI indicates body mass index; SBP, systolic blood pressure; DBP, diastolic blood pressure; FPG, fasting plasma glucose; TCHO, total cholesterol; TG, triglyceride; HDL-C, high-density lipoprotein cholesterol; LDL-C, low-density lipoprotein cholesterol; hsCRP, high-sensitivity C-reactive protein.

**Supplementary Table S2. The correlations of salt intake with myocardial strain rates and left ventricular function and structure**

|     | Global strain rates     |                | Left ventricular dysfunction and remodeling |                         |                |
|-----|-------------------------|----------------|---------------------------------------------|-------------------------|----------------|
|     | Correlation coefficient | <i>P-value</i> |                                             | Correlation coefficient | <i>P-value</i> |
| SRe | -0.666                  | < 0.001        | LVFS                                        | -0.368                  | < 0.001        |
| SRa | -0.642                  | < 0.001        | LVEF                                        | -0.347                  | < 0.001        |
| SRs | 0.607                   | < 0.001        | Tei index                                   | 0.394                   | < 0.001        |
|     |                         |                | LVM                                         | 0.515                   | < 0.001        |
|     |                         |                | LVMI                                        | 0.481                   | < 0.001        |
|     |                         |                | LVRI                                        | 0.253                   | < 0.001        |

The values present the Pearson or Spearman correlation coefficient depending on the normality of the data distribution for each variable. SRe, early diastolic maximum strain rate; SRa, late diastolic maximum strain rate; SRs, systolic maximum strain rate; LVFS, left ventricular short axis shortening rate; LVEF, left ventricular ejection fraction; LVM, left ventricular mass; LVMI, left ventricular mass index; LVRI, left ventricular remodeling index.

**Supplementary Table S3. The correlations of hsCRP serum level with myocardial strain rates and left ventricular function and structure**

|     | Global strain rates     |                | Left ventricular dysfunction and remodeling |                         |                |
|-----|-------------------------|----------------|---------------------------------------------|-------------------------|----------------|
|     | Correlation coefficient | <i>P-value</i> |                                             | Correlation coefficient | <i>P-value</i> |
| SRe | -0.506                  | < 0.001        | LVFS                                        | -0.272                  | < 0.001        |
| SRa | -0.480                  | < 0.001        | LVEF                                        | -0.260                  | < 0.001        |
| SRs | 0.440                   | < 0.001        | Tei index                                   | 0.313                   | < 0.001        |
|     |                         |                | LVM                                         | 0.452                   | < 0.001        |
|     |                         |                | LVMI                                        | 0.414                   | < 0.001        |
|     |                         |                | LVRI                                        | 0.300                   | < 0.001        |

The values present the Pearson or Spearman correlation coefficient depending on the normality of the variables. SRe, early diastolic maximum strain rate; SRa, late diastolic maximum strain rate; SRs, systolic maximum strain rate; LVFS, left ventricular short axis shortening rate; LVEF, left ventricular ejection fraction; LVM, left ventricular mass; LVMI, left ventricular mass index; LVRI, left ventricular remodeling index.
